# Supplementary material for: Exciton-vibrational resonance and dynamics of charge separation in the photosystem II reaction center
Source: Royal Society of Chemistry journal article supplement (doi:10.1039/c6cp07308e), 2017-01-01
Supplement: c6cp07308e1.pdf [file c6cp07308e1.pdf]

## Supplementary Information

### Exciton-vibrational resonance and dynamics of charge separation in photosystem II reaction center

Vladimir I. Novoderezhkin, Elisabet Romero, and Rienk van Grondelle

**Table S1.** The site energies and exciton couplings for the 4-state model of PSII-RC. Unperturbed energies of the zero-phonon transitions for the three excited states and CT are shown together with couplings (all quantities are in  $\text{cm}^{-1}$ ).

|                    | $P_{D1}$ | $P_{D2}$ | $\text{Chl}_{D1}$ | $P_{D2}^+P_{D1}^-$ |
|--------------------|----------|----------|-------------------|--------------------|
| $P_{D1}$           | 15020    | 150      | -42               | 75                 |
| $P_{D2}$           | 150      | 15020    | -56               | -75                |
| $\text{Chl}_{D1}$  | -42      | -56      | 14780             | 0                  |
| $P_{D2}^+P_{D1}^-$ | 75       | -75      | 0                 | 14520              |

**Table S2.** Energies and intensities of exciton-vibrational components of the absorption corresponding to the three different positions of the CT level (with unperturbed energies of other diabatic states). The values of the CT shift  $E_{CT}$  and other parameters of the model are the same as in Figure 2. Only 7 lowest vibronic eigenstates ( $b=1-7$ ) are shown. Their energies  $\omega$  are counted from ZPL of  $\text{Chl}_{D1}$ , intensities  $I$  are calculated as dipole strengths of the transitions to  $b$ -th level from the lowest vibrational sublevel of the ground (the only populated in the low-temperature limit). Participation of the four diabatic states (i.e.  $P_{D1}$ ,  $P_{D2}$ ,  $\text{Chl}_{D1}$ , and  $P_{D2}^+P_{D1}^-$ , respectively) in the vibronic eigenstates are shown with highlighting (by bold) of the biggest contributions to the localized and mixed states.

| $E_{CT}(\text{cm}^{-1})$ | $b$ | $\omega(\text{cm}^{-1})$ | $I(\text{Debye}^2)$ | $P_{D1}$      | $P_{D2}$      | $\text{Chl}_{D1}$ | $P_{D2}^+P_{D1}^-$ |
|--------------------------|-----|--------------------------|---------------------|---------------|---------------|-------------------|--------------------|
| -30                      | 1   | -307.07                  | <b>0.565</b>        | 0.0151        | 0.0152        | 0.0000            | <b>0.9697</b>      |
|                          | 2   | -11.38                   | <b>17.632</b>       | 0.0009        | 0.0445        | <b>0.9222</b>     | 0.0324             |
|                          | 3   | 7.35                     | <b>2.576</b>        | <b>0.1386</b> | <b>0.1053</b> | <b>0.0489</b>     | <b>0.7072</b>      |
|                          | 4   | 34.60                    | 0.041               | <b>0.0190</b> | <b>0.0195</b> | <b>0.0042</b>     | <b>0.9572</b>      |
|                          | 5   | 35.63                    | 0.023               | <b>0.0155</b> | <b>0.0155</b> | <b>0.0001</b>     | <b>0.9689</b>      |
|                          | 6   | 36.09                    | 0.003               | <b>0.0152</b> | <b>0.0151</b> | <b>0.0003</b>     | <b>0.9695</b>      |
|                          | 7   | 144.19                   | <b>13.566</b>       | <b>0.3533</b> | <b>0.3434</b> | 0.0048            | <b>0.2984</b>      |
| +40                      | 1   | -239.52                  | <b>0.804</b>        | 0.0203        | 0.0206        | 0.0001            | <b>0.9591</b>      |
|                          | 2   | -10.73                   | <b>15.974</b>       | 0.0027        | 0.0277        | <b>0.9667</b>     | 0.0029             |
|                          | 3   | 50.61                    | <b>8.582</b>        | <b>0.2503</b> | <b>0.2305</b> | <b>0.0088</b>     | <b>0.5104</b>      |
|                          | 4   | 98.38                    | 0.026               | <b>0.0287</b> | <b>0.0292</b> | <b>0.0017</b>     | <b>0.9403</b>      |
|                          | 5   | 100.59                   | 0.075               | <b>0.0203</b> | <b>0.0206</b> | <b>0.0001</b>     | <b>0.9591</b>      |
|                          | 6   | 100.61                   | 0.001               | <b>0.0204</b> | <b>0.0204</b> | <b>0.0001</b>     | <b>0.9591</b>      |
|                          | 7   | 172.34                   | <b>9.173</b>        | <b>0.2357</b> | <b>0.2314</b> | <b>0.0040</b>     | <b>0.5289</b>      |
| +140                     | 1   | -144.89                  | <b>1.530</b>        | 0.0347        | 0.0356        | 0.0003            | <b>0.9294</b>      |
|                          | 2   | -10.55                   | <b>15.394</b>       | 0.0040        | 0.0235        | <b>0.9709</b>     | 0.0015             |
|                          | 3   | 86.47                    | <b>14.293</b>       | <b>0.3838</b> | <b>0.3643</b> | 0.0067            | <b>0.2453</b>      |
|                          | 4   | 189.24                   | 0.114               | <b>0.0682</b> | <b>0.0697</b> | <b>0.0038</b>     | <b>0.8583</b>      |
|                          | 5   | 195.21                   | 0.145               | <b>0.0348</b> | <b>0.0356</b> | <b>0.0002</b>     | <b>0.9293</b>      |
|                          | 6   | 195.25                   | 0.002               | <b>0.0349</b> | <b>0.0353</b> | <b>0.0002</b>     | <b>0.9295</b>      |
|                          | 7   | 240.89                   | <b>3.478</b>        | <b>0.0927</b> | <b>0.0955</b> | <b>0.0050</b>     | <b>0.8069</b>      |

## Explicit expressions for the Redfield tensor

To describe the dynamics of one-exciton populations  $\rho_{b_1b_2}(T)$  we need the Redfield tensor  $R_{b_1b_2,b_3b_4}$ . In the Liouville space the populations are given by vector  $\rho_\alpha(T)$ , whereas the one-exciton relaxation tensor is  $R_{\alpha\beta}$ , with  $\alpha=b_1+(b_2-1)N_b$  and  $\beta=b_3+(b_4-1)N_b$ , where  $N_b$  is the vibronic cutoff, i.e. the number of one-exciton vibronic states included into the modelling of the dynamics. The  $R_{\alpha\beta}$  tensor can be expressed as a product  $B \otimes A$  of the tensors  $B_{b_2b_4}$  and  $A_{b_1b_3}$ . In matrix notations:

$$\begin{aligned} R &= - \sum_{n,j,s} \overline{(\varphi_n^{js})^2} (B_n^{js} \otimes A_n^{js} + A_n^{js} \otimes B_n^{js}) - \sum_n \overline{(\Phi_n)^2} (B_n^e \otimes A_n^e + A_n^e \otimes B_n^e) + \sum_n (B_n \otimes I + I \otimes B_n) \\ B_n^e &= C_n^+ C_n; \quad A_n^e = B_n^e * J; \quad C_n = \sum_{a,b} |a\rangle C_{na,b}^e \langle b| \\ B_n^{js} &= C_n^+ Q_n^{js} C_n; \quad A_n^{js} = B_n^{js} * J; \quad Q_n^{js} = Q_{js} - \Delta_n^{js} \\ B_n &= \overline{(\Phi_n)^2} C_n^+ C_n (C_n^+ C_n * J) + \sum_{js} \overline{(\varphi_n^{js})^2} C_n^+ Q_n^{js} C_n (C_n^+ Q_n^{js} C_n * J) \end{aligned} \quad (S1)$$

where  $I$  is a delta-operator,  $C_n$  is a fragment of the  $C^e$  corresponding to a fixed electronic site  $n$  (the sum of independent contributions from different sites appears since we use an uncorrelated fluctuation model). In terms like  $C_n Q_n C_n$  we assume a matrix multiply,  $B * J$  denotes an array multiply (product of the elements of the matrices),  $\otimes$  stand for a Kronecker tensor product. Such a form is useful for numerical evaluation of the Redfield tensor. The dynamics of vibronic populations is then given by:

$$\rho_\alpha = -i\omega_\alpha \rho_\alpha - \sum_\beta R_{\alpha\beta} \rho_\beta \quad (S2)$$

where  $\omega_\alpha = \omega_{b_1b_2} = \omega_{b_1} - \omega_{b_2}$ . The ground-state dynamics is purely vibrational and is given by populations  $\rho_{c_1c_2}(T)$  and the Redfield tensor  $R_{c_1c_2,c_3c_4}$ . In the Liouville space we have populations  $\rho_\gamma(T)$  and relaxation tensor  $R_{\gamma\delta}$ , with  $\gamma=c_1+(c_2-1)N_c$  and  $\delta=c_3+(c_4-1)N_c$ , where  $N_c$  is vibrational cutoff for the ground state. In matrix notations:

$$\begin{aligned} R &= - \sum_{j,s} \overline{(\varphi_g^{js})^2} (B_g^{js} \otimes A_g^{js} + A_g^{js} \otimes B_g^{js}) + (B_g \otimes I + I \otimes B_g) \\ B_g^{js} &= C^+ Q_g^{js} C; \quad A_g^{js} = B_g^{js} * J; \quad Q_g^{js} = Q_{js} - \Delta_g^{js}; \quad B_g = \sum_{js} \overline{(\varphi_g^{js})^2} C^+ Q_g^{js} C (C^+ Q_g^{js} C * J) \end{aligned} \quad (S3)$$

where  $C$  is the same as  $C^g$ . The dynamics of vibrational populations is:

$$\rho_\gamma = -i\omega_\gamma \rho_\gamma - \sum_\delta R_{\gamma\delta} \rho_\delta \quad (S4)$$
